# Supplementary material
Source: PubMed Central journal article supplement (PMC2736051)
Supplement: NIHMS125667-supplement-DOCs.pdf [file NIHMS125667-supplement-DOCs.pdf]

## *Supporting Information for*

### **Spontaneous Formation of Functionalized Dendrimer-Stabilized Gold Nanoparticles**

Xiangyang Shi, Kai Sun, and James R. Baker, Jr

1. Photographs of the Au particle suspension prepared using preformed G5.NHAc dendrimers as stabilizers.
2. TEM image, size distribution histogram, and photograph of the suspension of  $\{(Au^0)_7\text{-G5.NGlyOH}\}$  DSNPs prepared in the presence of free glycidol molecules.
3.  $^1\text{H}$  NMR spectra of G5.NH<sub>2</sub> and G5.NHAc dendrimers.
4.  $^1\text{H}$  NMR spectra of G5.NHAc-AF594 dendrimers and  $\{(Au^0)_{10}\text{-G5.NHAc-AF594}\}$  DSNPs.
5. MALDI-TOF mass spectrum of G5.NHAc-AF594 dendrimers.
6. Photographs of the aqueous suspensions of G5.NHAc-AF594 dendrimers and  $\{(Au^0)_{10}\text{-G5.NHAc-AF594}\}$  DSNPs.

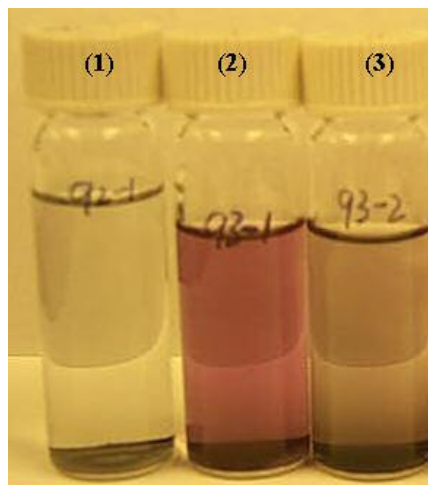

Figure S1 Photograph of Au NP suspensions prepared using preformed G5.NHAc dendrimers as stabilizers: (1) simply mixing G5.NHAc dendrimers with HAuCl<sub>4</sub>; (2) the mixture of G5.NHAc dendrimers and HAuCl<sub>4</sub> was added with triethylamine; (3) the mixture of G5.NHAc dendrimers, HAuCl<sub>4</sub>, and triethylamine was added with acetic anhydride.

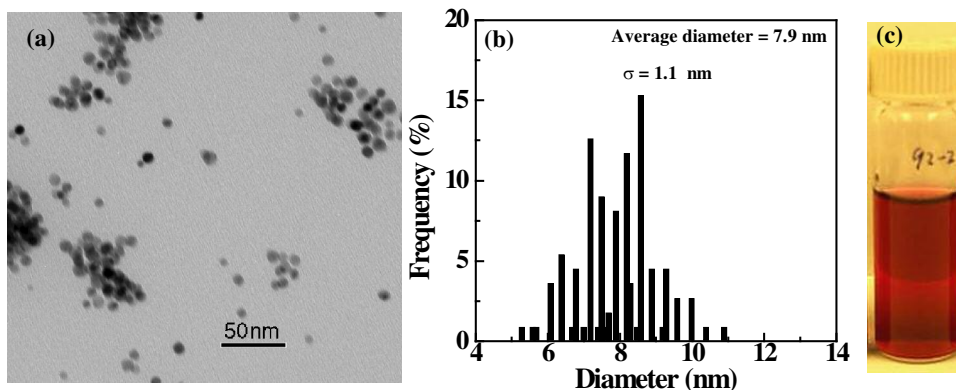

Figure S2 TEM image (a), size distribution histogram (b), and photograph (c) of the suspension of  $\{(Au^0)_7\text{-G5.NGlyOH}\}$  DSNPs prepared in the presence of free glycidol molecules.

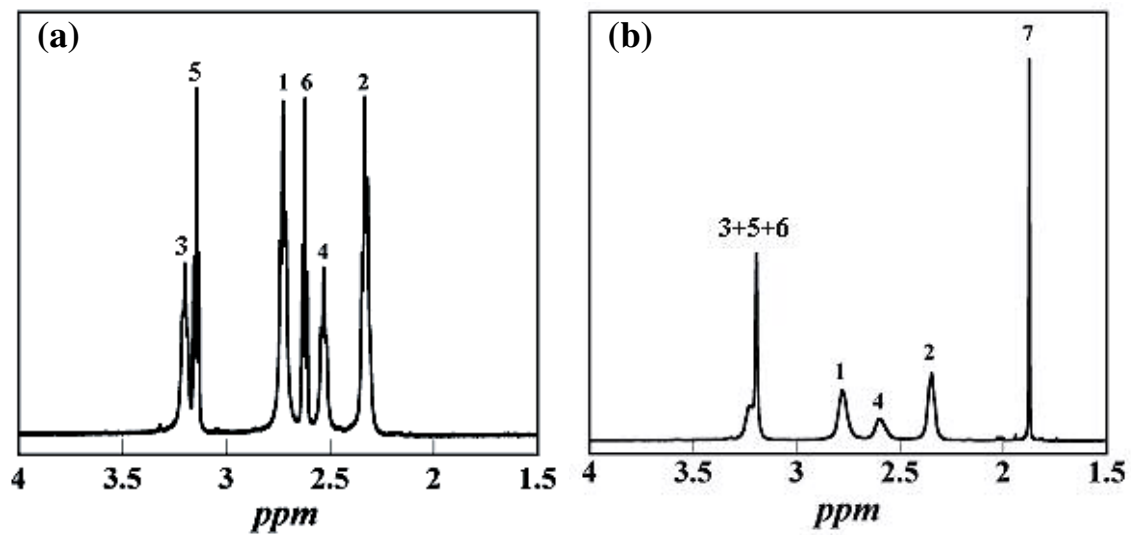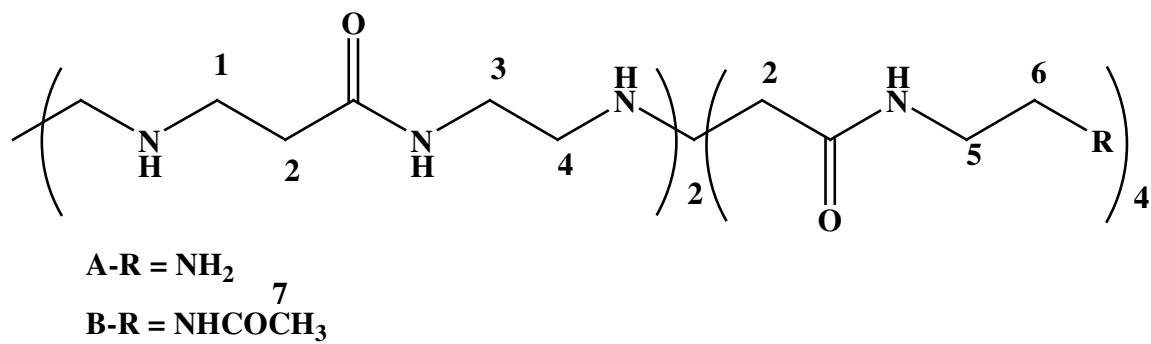

Figure S3.  $^1\text{H}$  NMR spectra of G5.NH<sub>2</sub> (a) and G5.NHAc (b) dendrimers.

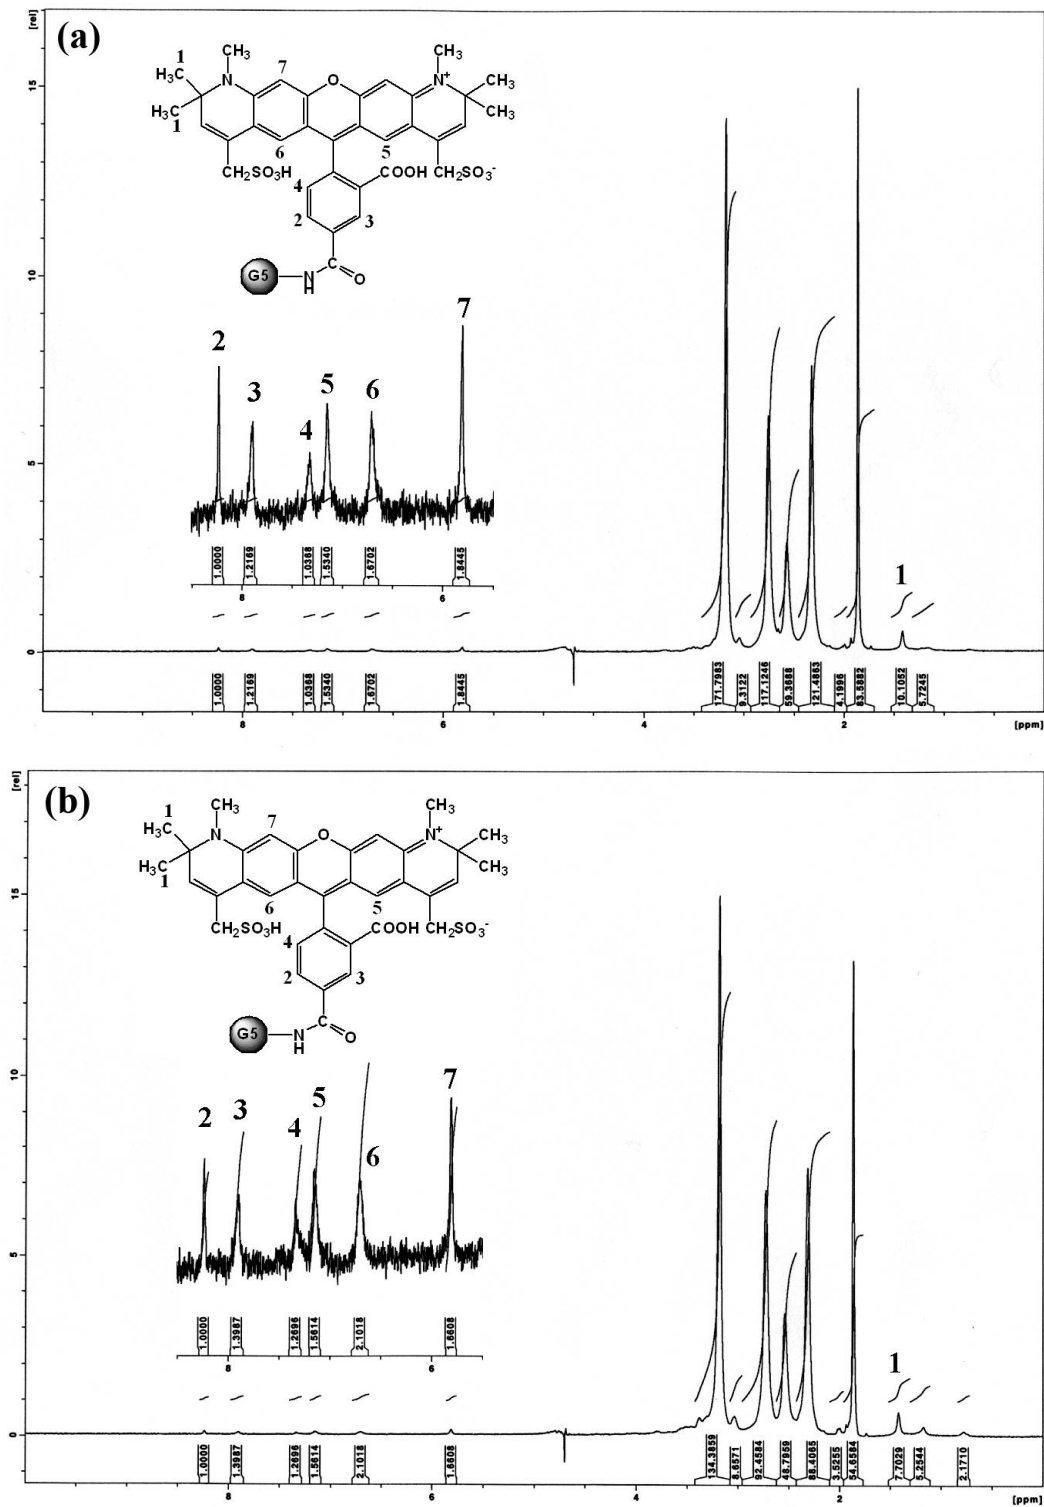

Figure S4. <sup>1</sup>H NMR spectra of G5.NHAc-AF594 dendrimers (a) and {(Au<sup>0</sup>)<sub>10</sub>-G5.NHAc-AF594} DSNPs (b).

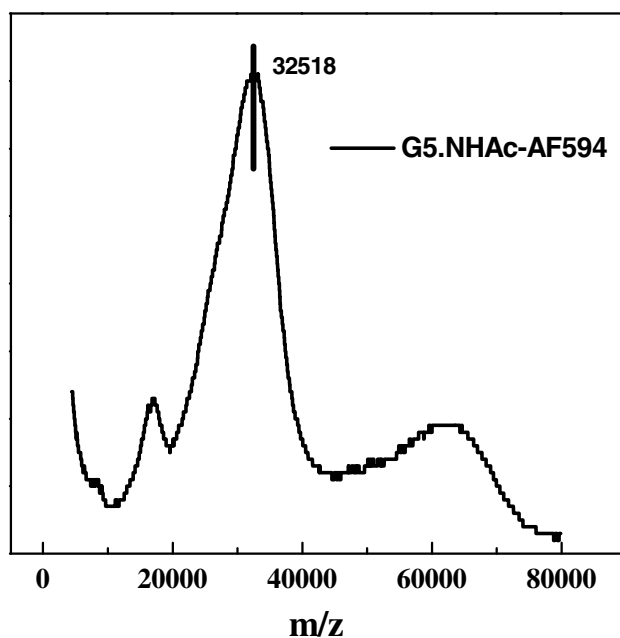

Figure S5. MALDI-TOF mass spectrum of G5.NHAc-AF594 dendrimers.

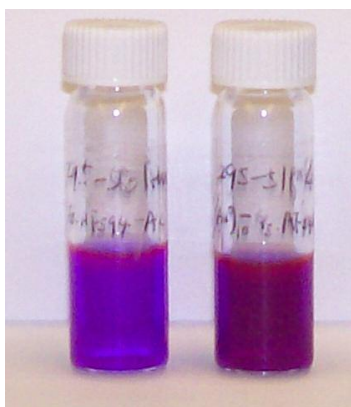

Figure S6. Photographs of the aqueous suspensions of G5.NHAc-AF594 dendrimers (left) and  $\{(Au^0)_{10}\text{-G5.NHAc-AF594}\}$  DSNPs (right).
